# Supplementary material
Source: publisher figshare collection journal article supplement (https://karger.figshare.com/articles/dataset/_/5121265)
Supplement: Supplementary file 2 [file 1]

**Table 1 SM. Haematological parameters in Group 1 ( $\geq 90$ ) by gender**

|                                           | <b>Men</b>         |                  | <b>Women</b>       |                  |
|-------------------------------------------|--------------------|------------------|--------------------|------------------|
|                                           | <b>Median (IR)</b> | <b>Mean (SD)</b> | <b>Median (IR)</b> | <b>Mean (SD)</b> |
| Glucose (mg/dL)                           | 90 (25)            | 98.72 (35.03)    | 92 (31)            | 102.4 (39.36)    |
| HBA <sub>1c</sub> Glycated hemoglobin (%) | 4.85 (1.1)         | 4.92 (0.86)      | 4.8 (1.1)          | 5.18 (3.26)      |
| Urea (mg/dL)                              | 38 (23)            | 42.6 (26.96)     | 36 (19.5)          | 39.09 (15.92)    |
| Creatinine (mg/dL)                        | 1.2 (0.4)          | 1.29 (0.87)      | 1 (0.3)            | 1.03 (0.37)      |
| GFR (mL/min/1.73 m <sup>2</sup> )         | 59.67 (23.41)      | 63.76 (21.76)    | 55.61 (25.94)      | 59.14 (18.45)    |
| Uric acid (mg/dL)                         | 5.4 (1.8)          | 5.62 (1.53)      | 4.5 (1.8)          | 4.72 (1.54)      |
| Sodium (mM/L)                             | 140 (5)            | 139.77 (3.73)    | 140 (4)            | 139.63 (3.2)     |
| Potassium (mM/L)                          | 4.6 (0.9)          | 4.62 (0.62)      | 4.4 (0.7)          | 4.43 (0.55)      |
| Clorure (mM/L)                            | 103.5 (4.25)       | 103.76 (3.28)    | 104 (4)            | 104.26 (3.24)    |
| Calcium (mg/dL)                           | 9.1 (0.6)          | 9.06 (0.52)      | 9 (0.8)            | 8.93 (0.69)      |
| Phosphorus (mg/dL)                        | 3 (0.7)            | 3.12 (0.87)      | 3.3 (0.7)          | 3.31 (0.53)      |
| Magnesium (mg/dL)                         | 2 (0.5)            | 2.04 (0.29)      | 2.1 (0.4)          | 2.06 (0.25)      |
| Aspartate Aminotransferase (U/L)          | 22 (8)             | 23.52 (7.78)     | 22 (8)             | 22.59 (9.84)     |
| Alanine Aminotransferase (U/L)            | 30 (10)            | 31.45 (8.08)     | 29 (7)             | 30.67 (9.53)     |
| Alkaline Phosphatase (U/L)                | 100 (47)           | 114.15 (50.01)   | 113 (54)           | 135.98 (102.71)  |
| Gamma-glutamyl transferase (U/L)          | 29 (25)            | 40.45 (33.09)    | 24 (16.75)         | 33.28 (25.44)    |
| Total bilirubine (mg/dL)                  | 0.65 (0.35)        | 0.71 (0.3)       | 0.6 (0.27)         | 0.65 (0.25)      |
| Direct bilirubine (mg/dL)                 | 0.1 (0.07)         | 0.13 (0.06)      | 0.1 (0.06)         | 0.11 (0.06)      |
| Indirect bilirubine (mg/dL)               | 0.54 (0.27)        | 0.58 (0.24)      | 0.5 (0.22)         | 0.54 (0.21)      |
| Total cholesterol (mg/dL)                 | 185 (56)           | 184 (38.23)      | 204 (60.5)         | 202.65 (43.28)   |
| Tryglicerid (mg/dL)                       | 100 (57)           | 112.05 (50.44)   | 111 (61.5)         | 121.43 (54.66)   |
| HDL cholesterol (mg/dL)                   | 56 (22)            | 58.13 (15.73)    | 57 (17)            | 58.94 (15.06)    |
| LDL cholesterol (mg/dL)                   | 106 (53.5)         | 103.33 (33.46)   | 119 (52)           | 119.84 (36.75)   |

|                                                   |              |                 |               |                 |
|---------------------------------------------------|--------------|-----------------|---------------|-----------------|
| Iron (µg/dL)                                      | 80 (56)      | 84.69 (43.7)    | 68 (40)       | 69.11 (32.08)   |
| Ferritin (ng/mL)                                  | 112 (160.25) | 154.59 (138.16) | 80.5 (150.25) | 152.25 (168.94) |
| Total protein (g/dL)                              | 6.8 (0.9)    | 6.85 (0.59)     | 6.7 (0.7)     | 6.73 (0.63)     |
| Albumin BCP (g/dL)                                | 3.8 (0.5)    | 3.73 (0.42)     | 3.7 (0.6)     | 3.62 (0.45)     |
| C-Reactive Protein (mg/L)                         | 56 (40)      | 60.27 (43.09)   | 42 (41)       | 52.88 (35.98)   |
| Thyrotropin (µIU/mL)                              | 1.43 (1.52)  | 1.72 (1.32)     | 1 (1.04)      | 1.38 (1.2)      |
| Thyroxine (ng/mL)                                 | 1.2 (0.26)   | 1.24 (0.22)     | 1.24 (0.37)   | 1.26 (0.29)     |
| Triiodothyronine (pg/mL)                          | 2.52 (0.74)  | 2.5 (0.56)      | 2.56 (0.99)   | 2.62 (0.66)     |
| Alpha 1 separated by electrophoresis (%)          | 3.4 (0.52)   | 3.5 (0.63)      | 3.5 (0.6)     | 3.58 (0.65)     |
| Alpha 2 separated by electrophoresis (%)          | 11.7 (2.1)   | 11.93 (1.6)     | 12.5 (2.1)    | 12.51 (1.66)    |
| Beta separated by electrophoresis (%)             | 10.7 (2)     | 10.95 (1.77)    | 11.2 (2.3)    | 11.58 (2.13)    |
| Gamma separated by electrophoresis (%)            | 18.9 (5.08)  | 19.08 (3.9)     | 18 (4.9)      | 18.5 (4.26)     |
| Leukocytes White blood cell (x10 <sup>3</sup> )   | 7.1 (2.5)    | 7.27 (1.96)     | 6.6 (2.33)    | 6.98 (2.04)     |
| Erythrocytes Red blood cell (x10 <sup>6</sup> )   | 4.49 (0.82)  | 4.44 (0.61)     | 4.37 (0.77)   | 4.75 (5.5)      |
| Hemoglobin (g/dL)                                 | 13.6 (2.2)   | 13.56 (1.79)    | 12.95 (2.2)   | 12.77 (1.85)    |
| Hematocrit (%)                                    | 41.1 (6.55)  | 41.07 (5.17)    | 39.35 (6.5)   | 40.22 (19.63)   |
| Mean corpuscular volume (femtoL)                  | 92.9 (8.55)  | 93.07 (8.58)    | 90.75 (7.18)  | 89.14 (8.61)    |
| Mean corpuscular hemoglobin (picog)               | 30.9 (3.05)  | 30.76 (3.21)    | 30.1 (2.65)   | 29.42 (2.98)    |
| Mean corpuscular haemoglobin concentration (g/dL) | 33.1 (0.9)   | 33.01 (0.82)    | 33 (1)        | 32.88 (0.95)    |
| Red blood cell distribution width (%)             | 13.9 (1.7)   | 14.17 (1.34)    | 13.8 (1.65)   | 14.21 (1.66)    |
| Platelet (x10 <sup>3</sup> )                      | 206 (88)     | 217.58 (75.42)  | 228 (105)     | 241 (91.84)     |
| Mean platelet volume (femtoL)                     | 9.05 (1.5)   | 9.26 (1.31)     | 9.2 (1.5)     | 9.4 (1.27)      |
| Neutrophil granulocytes (%)                       | 63.4 (14.45) | 61.99 (11.39)   | 62.6 (11.25)  | 63.44 (8.87)    |
| Lymphocytes (%)                                   | 23.4 (12.05) | 25.63 (10.1)    | 26.25 (10.9)  | 25.97 (7.57)    |
| Monocytes (%)                                     | 7.8 (3.3)    | 8.59 (3.02)     | 7.6 (2.63)    | 8.08 (5.38)     |
| Eosinophil granulocytes (%)                       | 2.2 (2.25)   | 2.74 (2.39)     | 1.6 (1.7)     | 2.04 (1.8)      |

*Supplementary Material (online only)*

|                                             |             |                |             |                |
|---------------------------------------------|-------------|----------------|-------------|----------------|
| Basophil granulocytes (%)                   | 0.6 (0.6)   | 0.98 (3.6)     | 0.6 (0.6)   | 0.69 (0.59)    |
| Prothrombin Time (sec.)                     | 13.5 (1.35) | 13.68 (0.85)   | 13.5 (1.4)  | 13.71 (0.91)   |
| Prothrombin normal activity (%)             | 89 (17.5)   | 89.26 (9.44)   | 90 (18.5)   | 89.14 (9.76)   |
| International normalized ratio              | 1.08 (0.15) | 1.09 (0.09)    | 1.07 (0.16) | 1.09 (0.09)    |
| Fibrinogen (mg/dL)                          | 379 (122.5) | 390.31 (91.36) | 370 (109)   | 390.78 (88.78) |
| Activated partial thromboplastin time (sec) | 33.9 (5.43) | 35.01 (5.04)   | 34.1 (4.9)  | 34.98 (9.9)    |

**Table 2 SM. Haematological parameters in Group 2 (65 – 85) by gender**

|                                   | <b>Men</b>         |                  | <b>Women</b>       |                  |
|-----------------------------------|--------------------|------------------|--------------------|------------------|
|                                   | <b>Median (IR)</b> | <b>Mean (SD)</b> | <b>Median (IR)</b> | <b>Mean (SD)</b> |
| Glucose (mg/dL)                   | 102 (27)           | 112.36 (43.86)   | 96 (25)            | 105.02 (34.03)   |
| HBA1c Glycated hemoglobin (%)     | 5.2 (1)            | 5.38 (1.03)      | 5.2 (1.1)          | 5.36 (1.04)      |
| Urea (mg/dL)                      | 32 (12)            | 34.41 (14.56)    | 30 (14)            | 31.51 (10.32)    |
| Creatinine (mg/dL)                | 1 (0.3)            | 1.06 (0.36)      | 0.8 (0.2)          | 0.83 (0.23)      |
| GFR (mL/min/1.73 m <sup>2</sup> ) | 78.07 (20.64)      | 79.72 (22.46)    | 75.95 (23.84)      | 79.16 (20.69)    |
| Uric acid (mg/dL)                 | 5.1 (1.7)          | 5.21 (1.41)      | 4.15 (1.7)         | 4.36 (1.24)      |
| Sodium (mM/L)                     | 141 (4)            | 140.6 (2.95)     | 141 (4)            | 140.93 (2.56)    |
| Potassium (mM/L)                  | 4.4 (0.6)          | 4.46 (0.51)      | 4.4 (0.5)          | 4.39 (0.45)      |
| Clorure (mM/L)                    | 104 (4)            | 103.9 (2.54)     | 104 (4)            | 103.95 (2.5)     |
| Calcium (mg/dL)                   | 9.4 (0.6)          | 9.39 (0.53)      | 9.5 (0.5)          | 9.48 (0.45)      |
| Phosphorus (mg/dL)                | 3.3 (0.7)          | 3.29 (0.57)      | 3.65 (0.7)         | 3.69 (0.71)      |
| Magnesium (mg/dL)                 | 2 (0.3)            | 1.97 (0.26)      | 2 (0.33)           | 2 (0.24)         |
| Aspartate Aminotransferase (U/L)  | 24 (12)            | 26.43 (13.26)    | 23 (10)            | 24.25 (8.8)      |
| Alanine Aminotransferase (U/L)    | 38 (12)            | 41.67 (19.52)    | 36.5 (10.25)       | 38.97 (12.57)    |
| Alkaline Phosphatase (U/L)        | 85 (39)            | 91.94 (44.25)    | 94 (39.25)         | 100.19 (30.22)   |
| Gamma-glutamyl transferase (U/L)  | 36 (24)            | 47.41 (49.39)    | 27 (13)            | 34.32 (26.9)     |
| Total bilirubine (mg/dL)          | 0.7 (0.35)         | 1.06 (4.09)      | 0.57 (0.24)        | 0.61 (0.23)      |
| Direct bilirubine (mg/dL)         | 0.1 (0.05)         | 0.13 (0.14)      | 0.1 (0.03)         | 0.09 (0.05)      |
| Indirect bilirubine (mg/dL)       | 0.58 (0.28)        | 0.66 (0.38)      | 0.49 (0.21)        | 0.79 (4.12)      |
| Total cholesterol (mg/dL)         | 199 (62)           | 198.62 (42.33)   | 214 (53.25)        | 218.91 (41.59)   |
| Tryglicerid (mg/dL)               | 120 (66)           | 130.6 (72.07)    | 120.5 (69)         | 137.7 (74.04)    |
| HDL cholesterol (mg/dL)           | 53 (22)            | 56.29 (15.99)    | 64 (24.5)          | 66.47 (17.3)     |
| LDL cholesterol (mg/dL)           | 116 (51.5)         | 116 (33.5)       | 123 (42.5)         | 125.07 (38.23)   |

|                                                   |              |                |              |               |
|---------------------------------------------------|--------------|----------------|--------------|---------------|
| Iron (µg/dL)                                      | 87 (58)      | 90.7 (40.85)   | 80 (44)      | 79.07 (34.7)  |
| Ferritin (ng/mL)                                  | 115 (137)    | 147.1 (160.55) | 68.5 (63.25) | 87.07 (90.15) |
| Total protein (g/dL)                              | 6.9 (0.5)    | 7.21 (4.28)    | 7 (0.63)     | 6.99 (0.44)   |
| Albumin BCP (g/dL)                                | 4.1 (0.4)    | 4.06 (0.31)    | 4 (0.4)      | 4.03 (0.27)   |
| C-Reactive Protein (mg/L)                         | 76 (58)      | 94.89 (79.39)  | 70 (54)      | 88.08 (67.9)  |
| Thyrotropin (µIU/mL)                              | 1.15 (1.07)  | 2.32 (9.38)    | 1.08 (1.11)  | 1.51 (3.01)   |
| Thyroxine (ng/mL)                                 | 1.27 (0.32)  | 1.29 (0.29)    | 1.27 (0.35)  | 1.29 (0.27)   |
| Triiodothyronine (pg/mL)                          | 3.38 (1.03)  | 3.37 (0.88)    | 3.3 (0.89)   | 3.25 (0.65)   |
| Alpha 1 separated by electrophoresis (%)          | 2.9 (0.7)    | 3.03 (0.59)    | 3.1 (0.6)    | 3.14 (0.47)   |
| Alpha 2 separated by electrophoresis (%)          | 11 (1.9)     | 11.15 (1.53)   | 11.8 (1.8)   | 12.24 (6.6)   |
| Beta separated by electrophoresis (%)             | 11 (2)       | 11.18 (1.86)   | 11.3 (1.8)   | 11.43 (1.5)   |
| Gamma separated by electrophoresis (%)            | 16.05 (4)    | 16.33 (3.22)   | 16.5 (3.9)   | 16.41 (3.24)  |
| Leukocytes White blood cell (x10 <sup>3</sup> )   | 6.6 (2.4)    | 7.05 (2.52)    | 6.5 (2.5)    | 7.12 (4.75)   |
| Erythrocytes Red blood cell (x10 <sup>6</sup> )   | 4.93 (0.62)  | 5.6 (7.45)     | 4.68 (0.51)  | 5.09 (6.3)    |
| Hemoglobin (g/dL)                                 | 14.9 (1.8)   | 14.57 (2.06)   | 13.8 (1.53)  | 13.52 (1.52)  |
| Hematocrit (%)                                    | 44.7 (5.3)   | 46.25 (23.45)  | 41.2 (4.53)  | 42.49 (23.61) |
| Mean corpuscular volume (femtoL)                  | 91.1 (7.5)   | 89.77 (8.92)   | 88.95 (6.7)  | 87.88 (8.25)  |
| Mean corpuscular hemoglobin (picog)               | 30.6 (2.75)  | 30.07 (2.87)   | 29.6 (2.55)  | 29.22 (3.05)  |
| Mean corpuscular haemoglobin concentration (g/dL) | 33.4 (0.9)   | 33.33 (0.79)   | 33.3 (1.05)  | 33.14 (1)     |
| Red blood cell distribution width (%)             | 13.1 (1.45)  | 13.47 (1.93)   | 12.9 (1.3)   | 13.18 (1.21)  |
| Platelet (x10 <sup>3</sup> )                      | 213 (76.5)   | 226.13 (76.04) | 242 (82)     | 246.1 (76.95) |
| Mean platelet volume (femtoL)                     | 9.5 (2.15)   | 9.69 (1.61)    | 9.5 (1.95)   | 9.78 (1.53)   |
| Neutrophil granulocytes (%)                       | 63.5 (12.05) | 63.41 (9.36)   | 62.1 (10.2)  | 62.42 (8.14)  |
| Lymphocytes (%)                                   | 25.5 (10.4)  | 25.93 (7.72)   | 28.2 (10.6)  | 28.08 (7.61)  |
| Monocytes (%)                                     | 7.6 (2.85)   | 7.8 (2.34)     | 7 (2.6)      | 7.18 (1.99)   |
| Eosinophil granulocytes (%)                       | 1.5 (1.8)    | 2.07 (2.2)     | 1.6 (1.3)    | 1.8 (1.29)    |

*Supplementary Material (online only)*

|                                             |              |                |              |                |
|---------------------------------------------|--------------|----------------|--------------|----------------|
| Basophil granulocytes (%)                   | 0.4 (0.4)    | 0.48 (0.63)    | 0.4 (0.6)    | 0.52 (0.5)     |
| Prothrombin Time (sec.)                     | 13.35 (0.75) | 14.35 (3.88)   | 13.2 (0.8)   | 13.58 (2.16)   |
| Prothrombin normal activity (%)             | 95 (12)      | 89.71 (16.75)  | 100 (8.75)   | 94.15 (11.45)  |
| International normalized ratio              | 1.04 (0.09)  | 1.15 (0.44)    | 1 (0.06)     | 1.07 (0.23)    |
| Fibrinogen (mg/dL)                          | 337 (90.75)  | 349.35 (87.83) | 349 (76.5)   | 357.37 (64.91) |
| Activated partial thromboplastin time (sec) | 35 (6.3)     | 37.25 (18.58)  | 33.85 (4.45) | 34.59 (4.65)   |
